# Supplementary material for: High levels of anti-inflammatory and pro-resolving lipid mediators lipoxins and resolvins and declining docosahexaenoic acid levels in human milk during the first month of lactation
Source: PubMed Central journal article supplement (PMC3698171; doi:10.1186/1476-511x-12-89), 2013-06-15

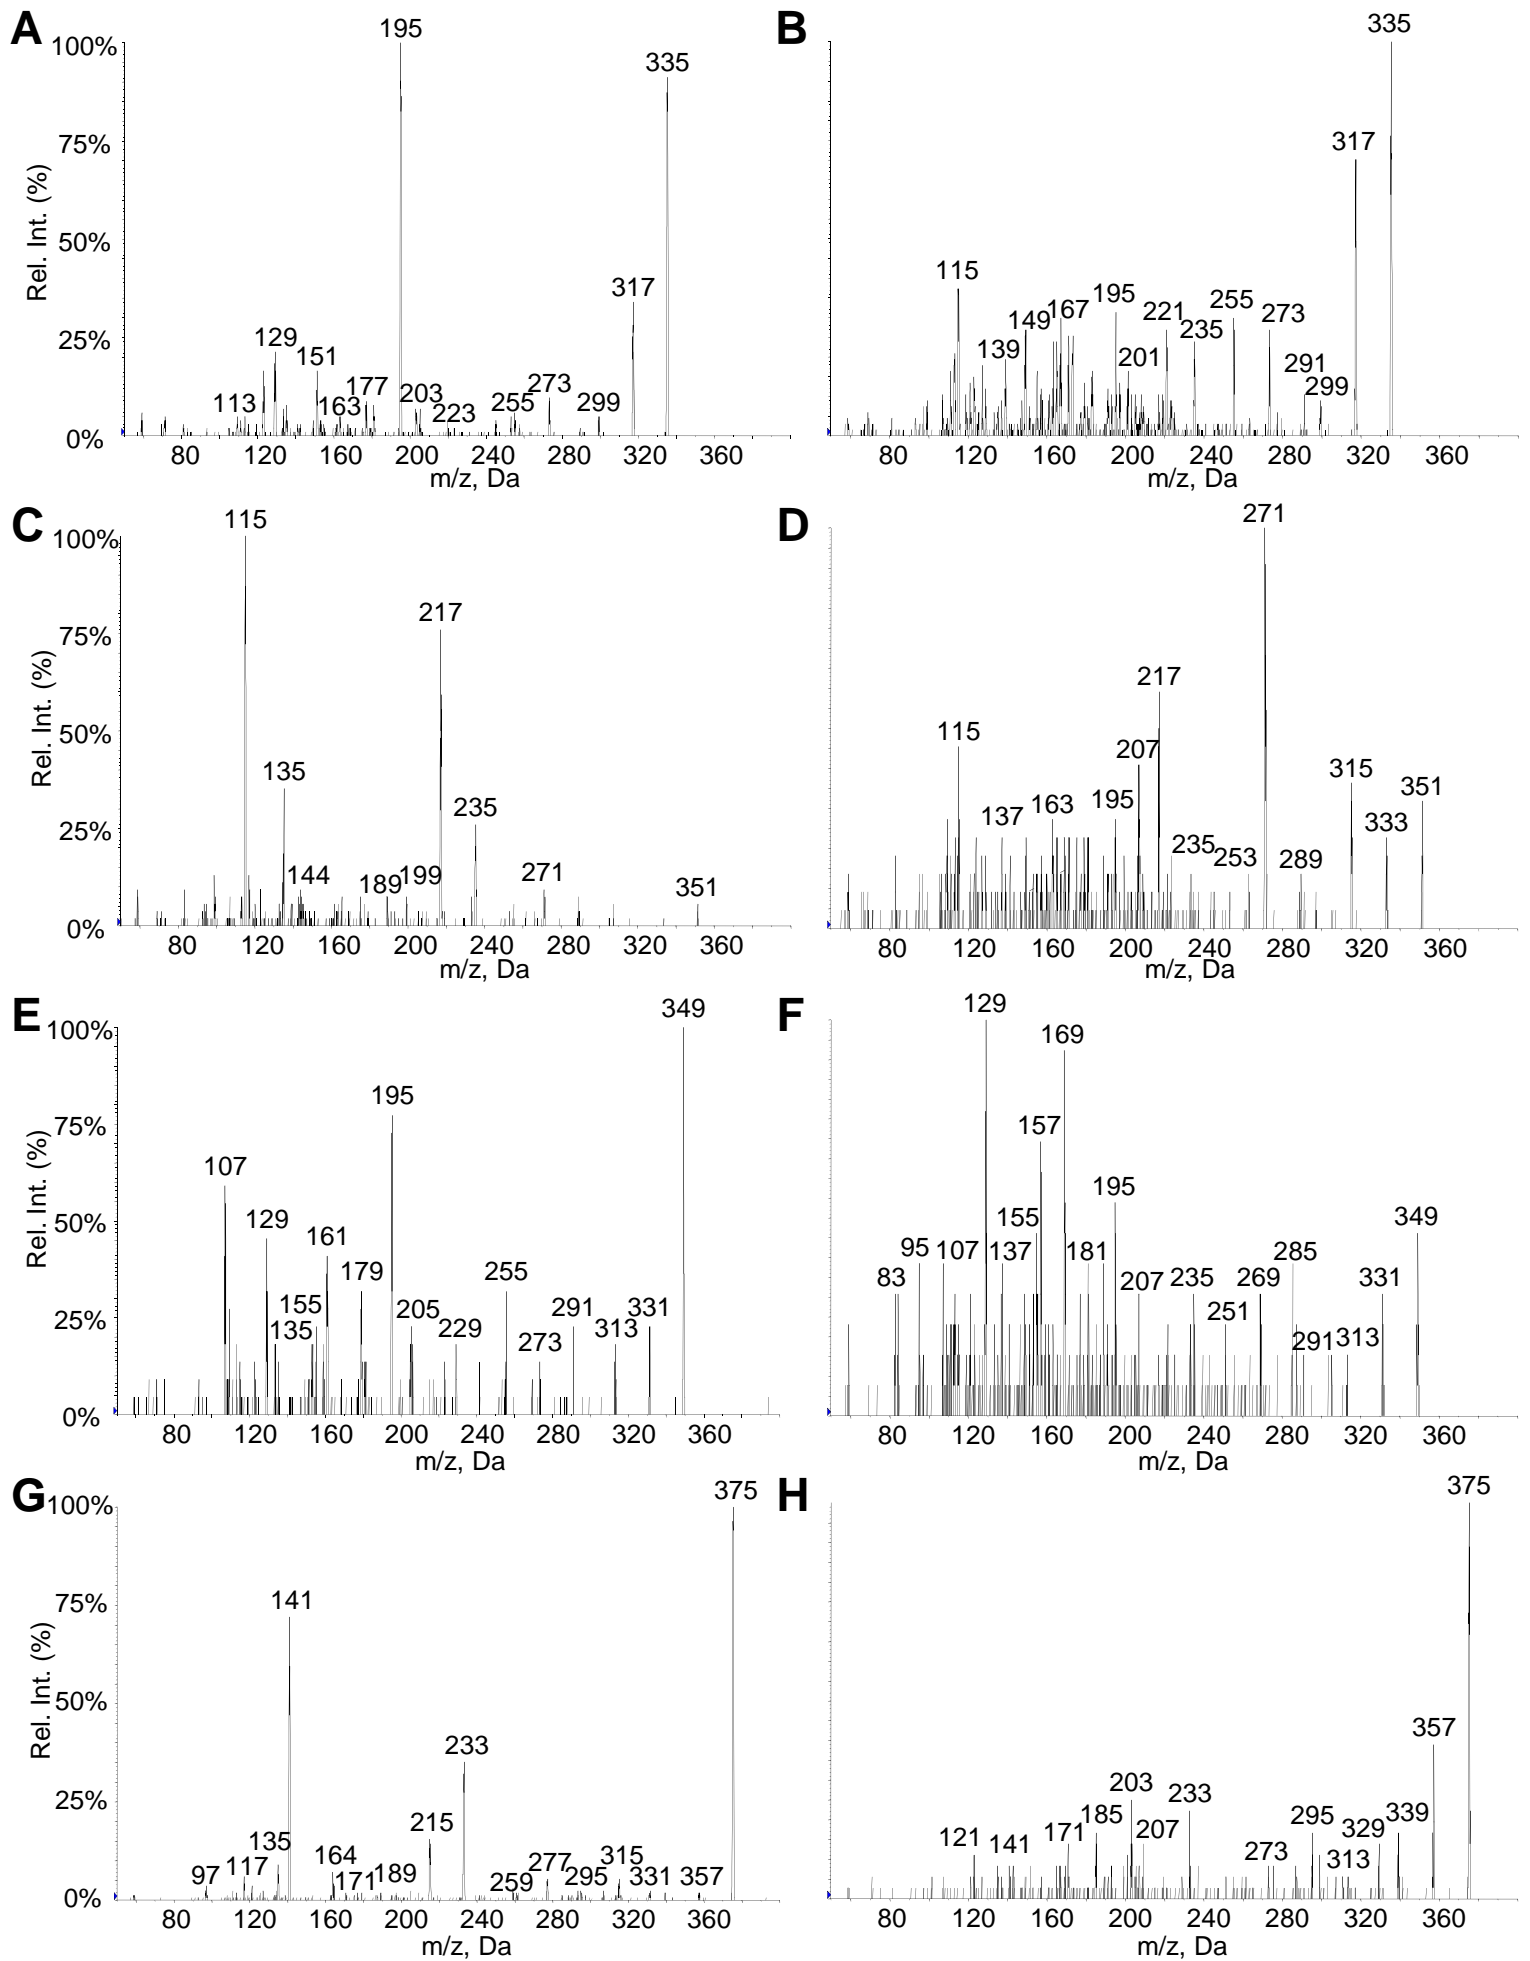

Supplement: 1476-511X-12-89-S2.pdf [file 1476-511X-12-89-S2.pdf]
